# Supplementary material for: Governance characteristics in building collaborative networks: lessons from a local initiative to reduce health inequalities
Source: Research Square preprint supplement (doi:10.21203/rs.3.rs-6128444/v1), 2025-04-16
Supplement: Supplementary file 1 [file 7032494fd2c1092e95360b33.docx]

**Supplementary Material**

**Appendix A**

Interview guide first phase of Healthy and Happy The Hague

Semi-structured interviews

Aim: Gain insight into the start and early survival of Healthy and Happy The Hague (HHTH). Or, in other words, unravel the governance process during the first phase and the development of HHTH over time.

Below are the interview topics related to the first phase of the HHTH network and some suggested questions. The interviews will be semi-structured, so the topics and associated questions below will be used as a guide, but the intention is also to ask thorough questions and engage in conversation with the interviewees.

General

How did it start at the very beginning in your opinion? Find out what the motivation was behind starting HHTH. What were the triggers to start? What were the obstacles and what was quickly agreed upon?

- How did the network took shape over time and at what level(s); With whom did you have contact in this very beginning phase? (🡪 Can we make a timeline?)
- How did the initiative come about according to you? What was the general cause or motivation behind it?
- How did the first contacts come about? / Did you already know the others?
- What was your motivation to start this network, or, to join in the first ideas/development phase?
- What was the importance for your organization to start/join this network?
- What was your role in the first phase of the network? How did this come about?

Collaboration

- How did you experience the way of working within the (core) team?
- How did the relationships with the healthcare and welfare organizations start?
- How were these relationships maintained?
- What motivated you to collaborate on certain topics?

Agreements

- how did the first (formal) agreements come about?
- When did the initial discussions on governance and possible structures of the HHTH network take place?
- How did these conversations go?
- What did you run into in these conversations and what did you quickly agree on?
  - Why?

Communication

Between large organizations involved in the starting phase of the network:

- Did you speak the same jargon? Or in other words, did you understand each other?
- What were obstacles in the communication?
  - If there were obstacles; How long did it take to understand each other?
- Were the contact persons of those organizations able to find each other and reach out to each other?
- What was the approach when new stakeholders joined? How were they included in the movement and did they learn to speak the same language?

Regarding the organizations’ constituencies:

- Was everyone (all organizations’ constituencies) informed from the beginning onwards?
- How did people react?
- Did the start of the network bring immediate changes for the professionals of the stakeholders (= the organization’s constituencies)?

**Topics generated from the document analysis (prior to the interviews)**

Finance

A division was made among the organizations involved to cover the required funding. How was the funding determined?

Just after the kickoff of HHTH, health insurers joined as these are the parties in the healthcare landscape responsible for funding much of the care that HHTH is also about.

- How did this process go of getting the health insurers on board?
- What were obstacles in this process and what went well?

Consultation groups

- How and why were the topics chosen for the consultation groups at the start of HHTH?
- Why were the ICT and labor market consultation groups being abandoned?
  - What caused these groups to be let go?
- Has this been picked up by other organizations within HHTH?

Citizen participation

- How did the community up/co-creation idea come about within HHTH?
- Why was this chosen? (There are also cities that think differently about if and how to let citizens participate).
- With whom were the initial contacts made to get this off the ground? (Already existing civic initiatives, loose citizen, through care institutions, ...?)
- How did the contacts with citizen get started?

Mission, vision and strategic goals

- How did this come about?
  - Was this decided with the first affiliated organizations or also already in co-creation with citizen (organizations)?
  - How did you look at examples from other regions?
- Were these mission vision and strategic goals axed somewhere in the process?
  - If so, how and why?

Strategy and approach

There is a data-driven neighborhood approach and there are three priority target groups (frail elderly, people with cardiovascular disease, people with serious psychiatric conditions)

- How were this approach and the target groups chosen?
- Who determined and on what basis?
- Was there discussion or quick agreement? And how did this discussion go?

Identified bottlenecks (Found in document analysis)

- - Too little direction and connection,
  - More focus on early signaling and prevention needed,
  - Shortage of staff
- Why were these selected?
- Did your organization also run into all three of these? How did you or your organization experience these bottlenecks?
- Did the network discuss any other bottlenecks not included here?

**Looking back on the first phase of HHTH:**

- - Are you satisfied with the start of the network?
- Why (not)?
  - Are you satisfied with where HHTH is now?
- Why (not)?
  - Looking back, what do you consider to be an important achievement of HHTH so far?
  - What have you learned from HHTH?
  - What is your dream for the future of HHTH?
  - Are there other people I should also speak to, in order to get a good picture of the starting phase of HHTH?
